# Supplementary material for: Comparing the Effect of Faecal Microbiota and Faecal Filtrate Transplantations on Intestinal Health in Weaned Piglets
Source: Research Square preprint supplement (doi:10.21203/rs.3.rs-8147738/v1), 2025-12-11
Supplement: Supplementary file 1 [file 24460b4da55e4bc27b42f6e4.xlsx]

## Sheet: Sup. Table 1
Table 1. Summary of the detection of the main possible pathogens with the Fluidigm technology in three potential high health status donor farms.
Potential pathogens	Farm 1	Farm 2	Farm 3
Brachyspira pilosicoli	negative	negative	negative
Escherichia coli F18	negative	negative	negative
Escherichia coli F4	negative	negative	negative
Lawsonia intracellularis	negative	negative	negative
Parvovirus type 2 (PCV2)	negative	negative	negative
Rotavirus A	negative	negative	negative
Rotavirus C	positive	negative	positive

## Sheet: Sup. Table 2
Table 2. Bacterial viability results by quantitative bacterial culture in aerobic and anaerobic conditions.
Sample	Temperature	Dilution	Inoculated volume (ml)	AEROBIC				ANAEROBIC						CFU/g (mean aerobic+anaerobic)	Nº capsules/70 g	Capsule volume (g)	CFU/capsule (mean aerobic+anaerobic)	CFU/70 g (mean aerobic+anaerobic)	Log10 CFU/70g
				Number of colonies LB	Number of colonies TSA	CFU/ml LB	CFU/ml TSA	Number of colonies LB	Number of colonies TSA	Number of colonies MRS	CFU/ml LB	CFU/ml TSA	CFU/ml MRS
Pre-Lyophilisation feaces	-80	1e-05	0.1	-	21	-	2.05e+07	-	52	-	-	5.2e+07	-	1.8125e+08	NA	NA	NA	1.26875e+10	10.0364
Lyophilisation faeces 1	-80	1e-05	0.1	30	10	3e+07	1e+07	45	21	26	4.5e+07	2.1e+07	2.6e+07	9.84509e+07	12	0.26	2.55972e+07	3.07167e+08	8.48737
	-80	1e-05	0.1	32	7	3.2e+07	7e+06	62	24	46	6.2e+07	2.4e+07	4.6e+07
	-80	1e-05	0.1	30	20	3e+07	2e+07	50	42	48	5e+07	4.2e+07	4.8e+07
				1.075e+07							4.04444e+07
Lyophilisation faeces 2	-80	1e-05	0.1	24	8	2.4e+07	8e+06	47	30	80	4.7e+07	3e+07	8e+07	9.57265e+07	12	0.26	2.48889e+07	2.98667e+08	8.47519
	-80	1e-05	0.1	13	14	1.3e+07	1.4e+07	27	22	65	2.7e+07	2.2e+07	6.5e+07
	-80	1e-05	0.1	17	8	1.7e+07	8e+06	35	28	51	3.5e+07	2.8e+07	5.1e+07
				7.00001e+06							4.27778e+07

## Sheet: Sup. Table 3
Table 3. Performing parameters between Control, FMT and FFT treatments.
		CONTROL	FMT	FFT	P-value
Days on test	d	21	21	21	-
Initial life weight	Kg	6.71	6.79	7.08	0.4723
Final life weight	Kg	12.03	12.43	11.67	0.1244
ADWG	g/d	253.37	268.89	218.37	0.1768
FCR per pen		1.43	1.24	1.33	-

## Sheet: Sup. Table 4
Table 4. Metadata used in metagenomic analysis.
Sample ID	Experimental day	Animal Type	Description	Sequencing method
101_3_D0	Original farm	101	FFT	16S Nanopore
101_3_D4	4	101	FFT	16S Nanopore
101_3_D7	7	101	FFT	16S Nanopore/Shotgun
101_3_D11	11	101	FFT	16S Nanopore
101_3_D16	16	101	FFT	16S Nanopore
101_3_D21	21	101	FFT	16S Nanopore
102_1_D0	Original farm	102	Control	16S Nanopore
102_1_D4	4	102	Control	16S Nanopore
102_1_D7	7	102	Control	16S Nanopore/Shotgun
102_1_D11	11	102	Control	16S Nanopore
102_1_D16	16	102	Control	16S Nanopore
102_1_D21	21	102	Control	16S Nanopore
103_2_D0	Original farm	103	FMT	16S Nanopore
103_2_D4	4	103	FMT	16S Nanopore
103_2_D7	7	103	FMT	16S Nanopore/Shotgun
103_2_D11	11	103	FMT	16S Nanopore
103_2_D16	16	103	FMT	16S Nanopore
103_2_D21	21	103	FMT	16S Nanopore
104_3_D0	Original farm	104	FFT	16S Nanopore
104_3_D4	4	104	FFT	16S Nanopore
104_3_D7	7	104	FFT	16S Nanopore/Shotgun
104_3_D11	11	104	FFT	16S Nanopore
104_3_D16	16	104	FFT	16S Nanopore
104_3_D21	21	104	FFT	16S Nanopore
105_2_D0	Original farm	105	FMT	16S Nanopore
105_2_D4	4	105	FMT	16S Nanopore
105_2_D7	7	105	FMT	16S Nanopore/Shotgun
105_2_D11	11	105	FMT	16S Nanopore
105_2_D16	16	105	FMT	16S Nanopore
105_2_D21	21	105	FMT	16S Nanopore
106_1_D0	Original farm	106	Control	16S Nanopore
106_1_D4	4	106	Control	16S Nanopore
106_1_D7	7	106	Control	16S Nanopore/Shotgun
106_1_D11	11	106	Control	16S Nanopore
106_1_D16	16	106	Control	16S Nanopore
106_1_D21	21	106	Control	16S Nanopore
107_2_D0	Original farm	107	FMT	16S Nanopore
107_2_D4	4	107	FMT	16S Nanopore
107_2_D7	7	107	FMT	16S Nanopore/Shotgun
107_2_D11	11	107	FMT	16S Nanopore
107_2_D16	16	107	FMT	16S Nanopore
107_2_D21	21	107	FMT	16S Nanopore
108_3_D0	Original farm	108	FFT	16S Nanopore
108_3_D4	4	108	FFT	16S Nanopore
108_3_D7	7	108	FFT	16S Nanopore/Shotgun
108_3_D11	11	108	FFT	16S Nanopore
108_3_D16	16	108	FFT	16S Nanopore
108_3_D21	21	108	FFT	16S Nanopore
111_3_D0	Original farm	111	FFT	16S Nanopore
111_3_D4	4	111	FFT	16S Nanopore
111_3_D7	7	111	FFT	16S Nanopore/Shotgun
111_3_D11	11	111	FFT	16S Nanopore
111_3_D16	16	111	FFT	16S Nanopore
111_3_D21	21	111	FFT	16S Nanopore
112_1_D0	Original farm	112	Control	16S Nanopore
112_1_D4	4	112	Control	16S Nanopore
112_1_D7	7	112	Control	16S Nanopore/Shotgun
112_1_D11	11	112	Control	16S Nanopore
112_1_D16	16	112	Control	16S Nanopore
112_1_D21	21	112	Control	16S Nanopore
115_1_D0	Original farm	115	Control	16S Nanopore
115_1_D4	4	115	Control	16S Nanopore
115_1_D7	7	115	Control	16S Nanopore/Shotgun
115_1_D11	11	115	Control	16S Nanopore
115_1_D16	16	115	Control	16S Nanopore
115_1_D21	21	115	Control	16S Nanopore
76_1_D0	Original farm	76	Control	16S Nanopore
76_1_D4	4	76	Control	16S Nanopore
76_1_D7	7	76	Control	16S Nanopore/Shotgun
76_1_D11	11	76	Control	16S Nanopore
76_1_D16	16	76	Control	16S Nanopore
76_1_D21	21	76	Control	16S Nanopore
77_2_D0	Original farm	77	FMT	16S Nanopore
77_2_D4	4	77	FMT	16S Nanopore
77_2_D7	7	77	FMT	16S Nanopore/Shotgun
77_2_D11	11	77	FMT	16S Nanopore
77_2_D16	16	77	FMT	16S Nanopore
77_2_D21	21	77	FMT	16S Nanopore
78_3_D0	Original farm	78	FFT	16S Nanopore
78_3_D4	4	78	FFT	16S Nanopore
78_3_D7	7	78	FFT	16S Nanopore/Shotgun
78_3_D11	11	78	FFT	16S Nanopore
78_3_D16	16	78	FFT	16S Nanopore
78_3_D21	21	78	FFT	16S Nanopore
79_1_D0	Original farm	79	Control	16S Nanopore
79_1_D4	4	79	Control	16S Nanopore
79_1_D7	7	79	Control	16S Nanopore/Shotgun
79_1_D11	11	79	Control	16S Nanopore
79_1_D16	16	79	Control	16S Nanopore
79_1_D21	21	79	Control	16S Nanopore
80_2_D0	Original farm	80	FMT	16S Nanopore
80_2_D4	4	80	FMT	16S Nanopore
80_2_D7	7	80	FMT	16S Nanopore/Shotgun
80_2_D11	11	80	FMT	16S Nanopore
80_2_D16	16	80	FMT	16S Nanopore
80_2_D21	21	80	FMT	16S Nanopore
81_3_D0	Original farm	81	FFT	16S Nanopore
81_3_D4	4	81	FFT	16S Nanopore
81_3_D7	7	81	FFT	16S Nanopore/Shotgun
81_3_D11	11	81	FFT	16S Nanopore
81_3_D16	16	81	FFT	16S Nanopore
81_3_D21	21	81	FFT	16S Nanopore
82_1_D0	Original farm	82	Control	16S Nanopore
82_1_D4	4	82	Control	16S Nanopore
82_1_D7	7	82	Control	16S Nanopore/Shotgun
82_1_D11	11	82	Control	16S Nanopore
82_1_D16	16	82	Control	16S Nanopore
82_1_D21	21	82	Control	16S Nanopore
83_2_D0	Original farm	83	FMT	16S Nanopore
83_2_D4	4	83	FMT	16S Nanopore
83_2_D7	7	83	FMT	16S Nanopore/Shotgun
83_2_D11	11	83	FMT	16S Nanopore
83_2_D16	16	83	FMT	16S Nanopore
83_2_D21	21	83	FMT	16S Nanopore
84_3_D0	Original farm	84	FFT	16S Nanopore
84_3_D4	4	84	FFT	16S Nanopore
84_3_D7	7	84	FFT	16S Nanopore/Shotgun
84_3_D11	11	84	FFT	16S Nanopore
84_3_D16	16	84	FFT	16S Nanopore
84_3_D21	21	84	FFT	16S Nanopore
85_2_D0	Original farm	85	FMT	16S Nanopore
85_2_D4	4	85	FMT	16S Nanopore
85_2_D7	7	85	FMT	16S Nanopore/Shotgun
85_2_D11	11	85	FMT	16S Nanopore
85_2_D16	16	85	FMT	16S Nanopore
85_2_D21	21	85	FMT	16S Nanopore
86_1_D0	Original farm	86	Control	16S Nanopore
86_1_D4	4	86	Control	16S Nanopore
86_1_D7	7	86	Control	16S Nanopore/Shotgun
86_1_D11	11	86	Control	16S Nanopore
86_1_D16	16	86	Control	16S Nanopore
86_1_D21	21	86	Control	16S Nanopore
87_2_D0	Original farm	87	FMT	16S Nanopore
87_2_D4	4	87	FMT	16S Nanopore
87_2_D7	7	87	FMT	16S Nanopore/Shotgun
87_2_D11	11	87	FMT	16S Nanopore
87_2_D16	16	87	FMT	16S Nanopore
87_2_D21	21	87	FMT	16S Nanopore
88_3_D0	Original farm	88	FFT	16S Nanopore
88_3_D4	4	88	FFT	16S Nanopore
88_3_D7	7	88	FFT	16S Nanopore/Shotgun
88_3_D11	11	88	FFT	16S Nanopore
88_3_D16	16	88	FFT	16S Nanopore
88_3_D21	21	88	FFT	16S Nanopore
89_1_D0	Original farm	89	Control	16S Nanopore
89_1_D4	4	89	Control	16S Nanopore
89_1_D7	7	89	Control	16S Nanopore/Shotgun
89_1_D11	11	89	Control	16S Nanopore
89_1_D16	16	89	Control	16S Nanopore
89_1_D21	21	89	Control	16S Nanopore
90_2_D0	Original farm	90	FMT	16S Nanopore
90_2_D4	4	90	FMT	16S Nanopore
90_2_D7	7	90	FMT	16S Nanopore/Shotgun
90_2_D11	11	90	FMT	16S Nanopore
90_2_D16	16	90	FMT	16S Nanopore
90_2_D21	21	90	FMT	16S Nanopore
91_3_D0	Original farm	91	FFT	16S Nanopore
91_3_D4	4	91	FFT	16S Nanopore
91_3_D7	7	91	FFT	16S Nanopore/Shotgun
91_3_D11	11	91	FFT	16S Nanopore
91_3_D16	16	91	FFT	16S Nanopore
91_3_D21	21	91	FFT	16S Nanopore
92_1_D0	Original farm	92	Control	16S Nanopore
92_1_D4	4	92	Control	16S Nanopore
92_1_D7	7	92	Control	16S Nanopore/Shotgun
92_1_D11	11	92	Control	16S Nanopore
92_1_D16	16	92	Control	16S Nanopore
92_1_D21	21	92	Control	16S Nanopore
94_3_D0	Original farm	94	FFT	16S Nanopore
94_3_D4	4	94	FFT	16S Nanopore
94_3_D7	7	94	FFT	16S Nanopore/Shotgun
94_3_D11	11	94	FFT	16S Nanopore
94_3_D16	16	94	FFT	16S Nanopore
94_3_D21	21	94	FFT	16S Nanopore
95_2_D0	Original farm	95	FMT	16S Nanopore
95_2_D4	4	95	FMT	16S Nanopore
95_2_D7	7	95	FMT	16S Nanopore/Shotgun
95_2_D11	11	95	FMT	16S Nanopore
95_2_D16	16	95	FMT	16S Nanopore
95_2_D21	21	95	FMT	16S Nanopore
96_1_D0	Original farm	96	Control	16S Nanopore
96_1_D4	4	96	Control	16S Nanopore
96_1_D7	7	96	Control	16S Nanopore/Shotgun
96_1_D11	11	96	Control	16S Nanopore
96_1_D16	16	96	Control	16S Nanopore
96_1_D21	21	96	Control	16S Nanopore
97_2_D0	Original farm	97	FMT	16S Nanopore
97_2_D4	4	97	FMT	16S Nanopore
97_2_D7	7	97	FMT	16S Nanopore/Shotgun
97_2_D11	11	97	FMT	16S Nanopore
97_2_D16	16	97	FMT	16S Nanopore
97_2_D21	21	97	FMT	16S Nanopore
98_3_D0	Original farm	98	FFT	16S Nanopore
98_3_D4	4	98	FFT	16S Nanopore
98_3_D7	7	98	FFT	16S Nanopore/Shotgun
98_3_D11	11	98	FFT	16S Nanopore
98_3_D16	16	98	FFT	16S Nanopore
98_3_D21	21	98	FFT	16S Nanopore
99_1_D0	Original farm	99	Control	16S Nanopore
99_1_D4	4	99	Control	16S Nanopore
99_1_D7	7	99	Control	16S Nanopore/Shotgun
99_1_D11	11	99	Control	16S Nanopore
99_1_D16	16	99	Control	16S Nanopore
99_1_D21	21	99	Control	16S Nanopore
